# Supplementary material
Source: PubMed Central journal article supplement (PMC6894402)
Supplement: NIHMS1541433-supplement-1.pdf [file NIHMS1541433-supplement-1.pdf]

1 **Supplementary Information**

2

3 **Great Oxidation and Lomagundi events linked by deep cycling and enhanced degassing of**  
4 **carbon**

5 James Eguchi<sup>1,2</sup>, Johnny Seales<sup>1</sup>, Rajdeep Dasgupta<sup>1</sup>

6 <sup>1</sup>Department of Earth, Environmental and Planetary Sciences, Rice University, 6100 Main Street,  
7 MS-126, Houston, TX 77005

8 <sup>2</sup>Current Address: Department of Earth and Planetary Sciences, University of California,  
9 Riverside, 900 University Ave., Riverside, CA 92521

10

11 **Quantifying organic carbon release in partial melts with different compositions**

12 In Fig. 2c graphite solubility was calculated for a single, specific sediment partial melt  
13 composition using the model of Duncan and Dasgupta<sup>27</sup>. However, Duncan and Dasgupta<sup>27</sup>  
14 based their calculations on the assumption that a rhyolitic melt composition, identical to their  
15 experiments apply to all subduction zones – present and past – as the agent of CO<sub>2</sub> dissolution  
16 from graphite-saturated crustal lithologies. This assumption may not hold if TTG-type sediment  
17 compositions are more relevant for ancient subductions. To accommodate compositional  
18 diversity of downgoing sediments, and thus variation of hydrous melt compositions that dissolve  
19 CO<sub>2</sub> from graphite-saturated sediments, we use a recent model from Eguchi and Dasgupta<sup>55</sup>,  
20 which can be used to calculate CO<sub>2</sub> solubility in graphite-saturated silicate melts for any given  
21 composition. In our calculations of graphite/diamond dissolution in silicate melts we use the  
22 same *P-T* paths and *f*O<sub>2</sub> used in Fig. 2. We performed our calculations for three different silicate  
23 melt compositions (Supplementary Table 4) that span the plausible compositions of hydrous

24 silicic melt generated from different crustal sediments. Organic C removal efficiency would be  
25 even lower if more reduced slab conditions are used, *i.e.*, the  $fO_2$  conditions used give the highest  
26  $CO_2$  dissolution capacity and graphite/diamond saturation. Supplementary Fig. 1 demonstrates  
27 that even after considering a wide range of silicate melt compositions, our conclusion that  
28 graphitized organic C is likely to remain in the subducting slab remains unchanged.

### 29 **Factors affecting shape and magnitude of oxygen increase and carbon isotope excursion**

30 In supplementary Fig. 2a,b we explore the effects of variable release efficiency of  
31 carbonates and graphitized organic carbon at sub-arc depths. For carbonate release efficiency we  
32 vary  $\alpha_{carb}$  from 1.0 to 0.6 (supplementary Fig. 2a), corresponding to 100% to 60% of subducted  
33 carbonates being released at arcs, with the remainder being released later at ocean islands.

34 Decreasing  $\alpha_{carb}$  (decreasing the fraction of carbonates released at arcs) decreases the magnitude  
35 of the C isotope excursion in carbonates. This covers the plausible range of values suggested by  
36 Fig. 2, save for the coldest subduction zones, in which there will be negligible carbonate as well  
37 as organic C release. We vary  $\alpha_{org}$  from 0.0 to 0.4 (supplementary Fig. 2b), which corresponds to  
38 0% to 40% of subducted organic C being released at arcs, with the remainder being released later  
39 at ocean islands. Increasing  $\alpha_{org}$  from 0.0 to 0.4 (releasing more organic C at arcs) decreases the  
40 magnitude of the C isotope excursion in carbonates. This covers the plausible range of organic C  
41 release efficiency suggested by calculations shown in Fig. 2 and supplementary Fig. 1.

42 In supplementary Fig 2c we investigate how changing the fraction of C that remains in  
43 the crustal reservoir versus that being subducted affects the model output. In the model, the  
44 fraction of C that remains in the crustal reservoir is controlled by the parameter  $\chi$ . In  
45 supplementary Fig. 1c we vary  $\chi$  from 0.8 to 0.4, which represent 80% to 40% of carbonates and  
46 organic C produced being subducted into the mantle. Decreasing the amount of C that gets

47 subducted into the mantle decreases the magnitude of the C isotope excursion in carbonates.  
48 Supplementary Fig. 2c demonstrates that if 80% of carbonates are subducted the model closely  
49 reproduces the magnitude of the observed C isotope excursion.

50 In supplementary Fig. 2d we investigate the effect of varying the length of time required  
51 for organic C to be released at ocean islands. We investigate delay times of 200-500 Myr based  
52 upon the reasoning that subducted crust would travel ~10,000 km (down ~3000km, horizontally  
53 along core-mantle boundary ~3000 km, then up 3000 km) on its path from subduction to release  
54 at ocean islands at rates of ~2-10 cm/yr. This covers most of the range suggested for mantle  
55 convection velocities. These values assume that subducted crust does not accumulate at the core-  
56 mantle boundary for significant time periods, which has been shown by modeling studies of  
57 mantle convection<sup>32</sup>. Increasing the delay time of organic C release at ocean island volcanoes  
58 causes the C isotope excursion in carbonates to become more long-lived.

59 In supplementary Fig. 2e we show how varying the magnitude of increases in mid-ocean  
60 ridge CO<sub>2</sub> emissions affects the magnitude of the C isotope excursion. When the magnitudes of  
61 CO<sub>2</sub> emission increases are small, then larger magnitudes of CO<sub>2</sub> emission increases result in  
62 larger C isotope excursions. However, when the change to CO<sub>2</sub> emissions are greater than about  
63 100-fold then any further increase in the magnitude of CO<sub>2</sub> increase does not result in a larger C  
64 isotope excursion (See Supp. Fig. 2e). This is most likely due to forcing model changes by  
65 changing CO<sub>2</sub> at mid-ocean ridges, which have  $\delta^{13}\text{C}$  fixed at -5‰. When the increase of CO<sub>2</sub>  
66 emissions at mid-ocean ridges are large, they will play a more prominent role in controlling  
67  $\delta^{13}\text{C}_{\text{carb}}$  and will cap the magnitude of the C isotope excursion. In the current model design, the C  
68 isotope excursion does not reach the peak values observed in the geologic record, except when  
69 the amount of C subducted is high (Supp. Fig. 2c). This could be an artifact of forcing model

70 changes by only increasing CO<sub>2</sub> emissions at mid-ocean ridges. Additionally, we cannot rule out  
71 that small changes to  $f_{\text{org}}$  could have contributed the overall magnitude of the modeled C isotope  
72 excursion.

73

#### 74 **Adjusting CO<sub>2</sub> emissions to present-day estimates**

75 We would like to emphasize that some of the ranges of values discussed above may be  
76 highly uncertain, and the equations used may be simplistic (Eq. 5). However, tighter constraints  
77 and added model complexity are unlikely to change the general behavior of the model. Rather,  
78 they would have small effects on the magnitudes of the behavior observed in the present model.  
79 To be clear, the goal of the present study is not to accurately reproduce the precisely recorded  
80  $p\text{CO}_2$  record for more recent time periods (*i.e.*, refs. <sup>56,57</sup>). Many of the parameters for the time  
81 period we are investigating are poorly constrained so it may be unwarranted to attempt to more  
82 precisely reproduce the natural data with models of added complexity. Here, we seek only to  
83 demonstrate that with the new suggestions in this contribution that the present model can drive  
84 increased atmospheric oxygen and a positive carbon isotope excursion which are of the same  
85 orders of magnitude as the natural data. Future studies may investigate how adding more  
86 complexities to the surface carbon cycle affect model behavior, but that is beyond the scope of  
87 the present study.

88 However, as a test of the robustness of the present model, we increased the MORB  
89 emissions a second time to  $10^{16}$  g C/Myr (3 order of magnitude increase), close to present-day  
90 estimates<sup>41</sup>. In Fig. 5 increased oxygen and the carbon isotope excursion are driven by increasing  
91 MOR CO<sub>2</sub> emissions by 3 orders of magnitude. Using geodynamic mantle convection models  
92 coupled with mantle melting, Fuentes et al.<sup>14</sup> demonstrate that an abrupt transition from sluggish

93 lid to plate tectonics could increase the flux of CO<sub>2</sub>/m of mid-ocean ridges by a factor of ~10. If  
94 the transition is accompanied by an increase in ridge and arc length as is expected in a stagnant  
95 lid to mobile lid transition, the modeled factor of 10 can easily increase by orders of magnitude.  
96 Therefore, we argue that the 3 order of magnitude increases in MOR CO<sub>2</sub> emissions used to  
97 drive the changes in Fig. 5 and supplementary Fig. 3 are reasonable for major tectonic transitions  
98 such as sluggish/stagnant lid to plate tectonic transition. Similarly, the second major increase in  
99 MOR CO<sub>2</sub> emissions could have been driven by increased plate tectonic activity, which has been  
100 suggested at the end of the Proterozoic<sup>17,24,45</sup>. With present day C fluxes, the model predicts O<sub>2</sub>  
101 close to present-day levels. Additionally, the model predicts C reservoir sizes and fluxes, which  
102 are within 1-2 orders of magnitude of present-day estimates, *i.e.*, the model predicts an  
103 atmosphere-ocean C reservoir size on the order of 10<sup>19</sup> g compared to actual estimates of  
104 ~4×10<sup>19</sup> g (Ref.<sup>58</sup>), and the model predicts a weathering flux on the order of 10<sup>19</sup> g C/Myr  
105 compared to actual estimates on the order of 10<sup>19</sup> g C/Myr (Ref.<sup>59</sup>). Although, the model was not  
106 designed for this, the fact that using present-day MOR fluxes results in reasonable C reservoir  
107 gives us confidence that the model is an acceptable representation of the natural C cycle.  
108

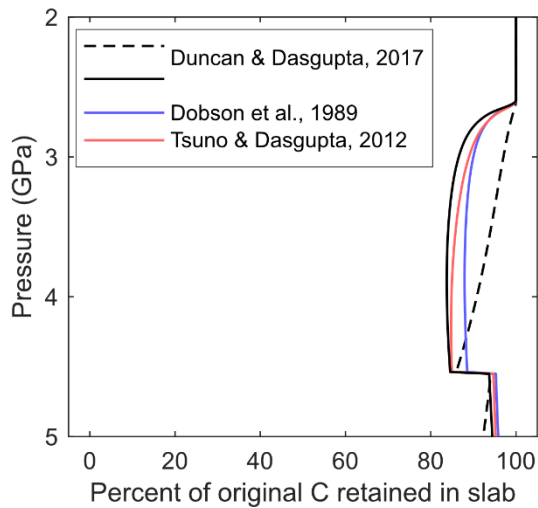

109

110 **Supplementary Figure 1 Amount of subducted C retained in slab during the partial**  
 111 **melting of graphite-saturated lithologies of different compositions.** Dashed black curve  
 112 shows how much C will be retained in the subducting slab when a sediment melt with  
 113 intermediate SiO<sub>2</sub> and high alkali contents is produced (Calculated with model of Duncan and  
 114 Dasgupta<sup>27</sup>) (Same as average curve in Fig. 2c). Solid black curve is calculated with the same  
 115 composition, but using the solubility model of Eguchi and Dasgupta<sup>55</sup>. Blue and orange curves  
 116 show how much C will be retained in the subducting slab when sediment melts with high and low  
 117 SiO<sub>2</sub> contents, respectively, are produced (Calculated with model of Eguchi and Dasgupta<sup>55</sup>).  
 118 Melt compositions given in Supplementary Table 4.

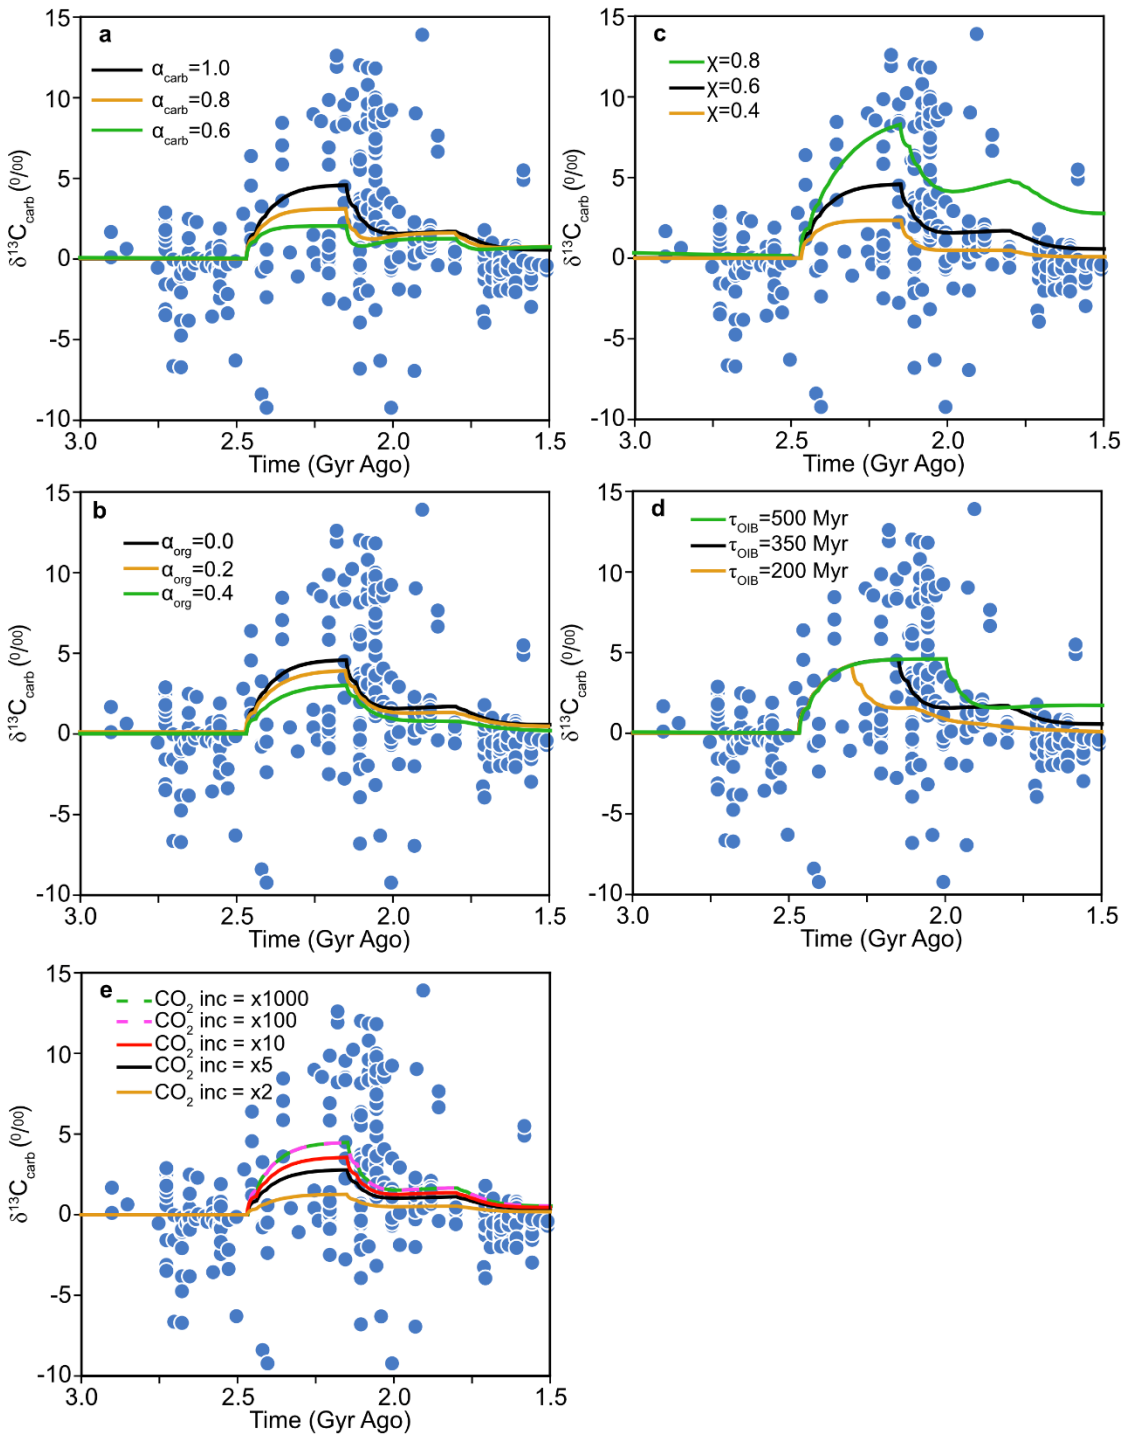

119

120 **Supplementary Figure 2 Variables affecting magnitude and shape of carbon isotope**

121 **excursion. a**, This figure is generated with the same initial conditions and parameters used in

122 Fig. 5, except we vary  $\alpha_{\text{carb}}$  to illustrate the effect differences in the release efficiency of

123 carbonate C at arcs has on model carbon isotope evolution. **b**, Same as **(a)** except we vary  $\alpha_{\text{org}}$  to  
124 illustrate the effect differences in the release efficiency of organic C at arcs has on model carbon  
125 isotope evolution. **c**, Same as **(a)** except we vary  $\chi$  to illustrate the effect differences in  
126 subduction efficiency of C has on model carbon isotope evolution. **d**, Same as **(a)** except we vary  
127  $\tau_{\text{OIB}}$  to illustrate the effect differences in the delay time for the release of organic C at OIBs has  
128 on model carbon isotope evolution. **e**, same as **(a)** except we vary the magnitude of the increase  
129 in MOR CO<sub>2</sub> emissions. Note that at large magnitudes of CO<sub>2</sub> increase the magnitude of C  
130 isotope excursions becomes insensitive the magnitude of the change in CO<sub>2</sub> emissions, *i.e.* the  
131 curves for 100-fold and 1000-fold increase in CO<sub>2</sub> emissions create the same magnitude of C  
132 isotope excursion.



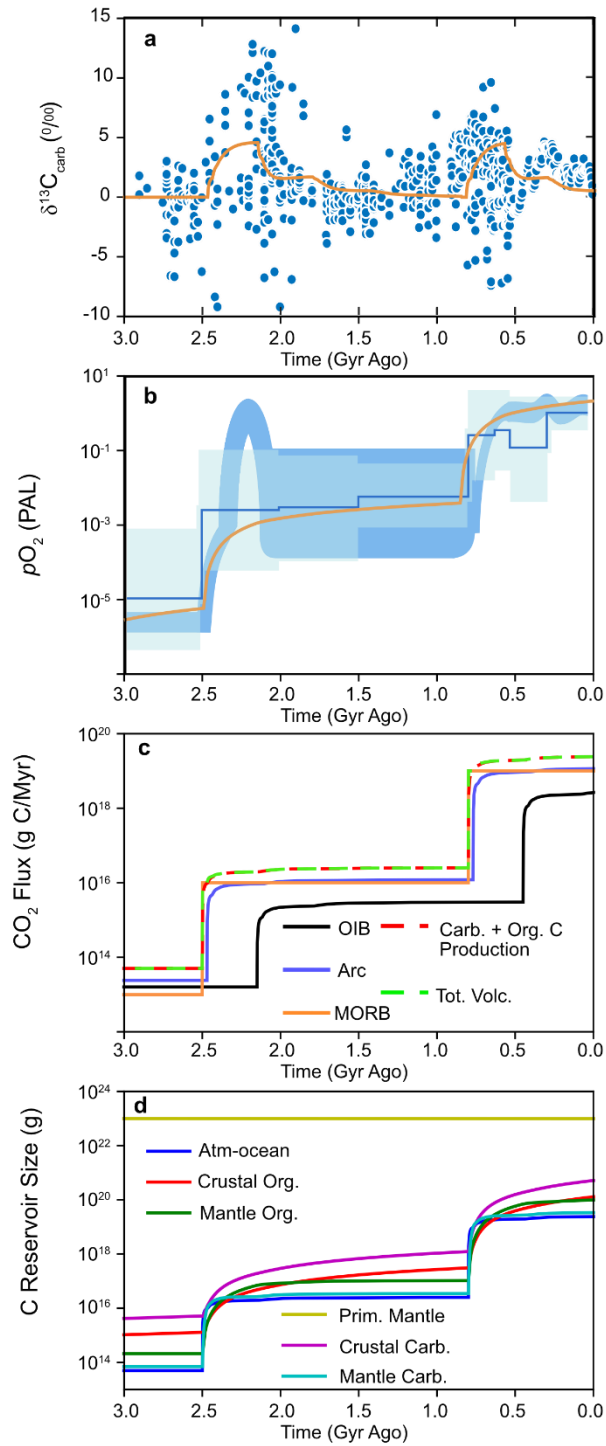

133

134 **Supplementary Figure 3 Increasing CO<sub>2</sub> Emissions to present day** Same as Fig. 5 of main  
 135 text, but with a second increase in MOR emissions from  $10^{16}$  g/Myr to  $10^{19}$  g/Myr which is close  
 136 to present estimates<sup>41</sup>. Note that if CO<sub>2</sub> emissions are set close to present-day estimates, then O<sub>2</sub>

137 levels are close to present day levels. Additionally, model dependent C reservoirs (**d**) and fluxes  
138 (**c**) are similar to values for the present-day Earth. Prescribing a second increase in CO<sub>2</sub>  
139 emissions generates a second carbon isotope excursion and increase in oxygen, which is  
140 observed in the natural data at the end of the Proterozoic. This demonstrates that the mechanism  
141 described here may explain other important times in Earth history in addition to the GOE and  
142 LE.  
143

144 **Supplementary Table 1** Initial conditions and parameters used in model run to generate Fig. 5

| <b>Initial Conditions</b>                         | <b>Value</b> | <b>Units</b>         |
|---------------------------------------------------|--------------|----------------------|
| $C_{\text{atm}}(0)$                               | 0            | [g]                  |
| $C_{\text{carb}}(0)$                              | 0            | [g]                  |
| $C_{\text{org}}(0)$                               | 0            | [g]                  |
| $C_{\text{mcarb}}(0)$                             | 0            | [g]                  |
| $C_{\text{morg}}(0)$                              | 0            | [g]                  |
| $C_{\text{prm}}(0)$                               | $10^{23}$    | [g]                  |
| $F_{\text{MORB}}, F_{\text{Arc}}, F_{\text{OIB}}$ | $10^{13}$    | [g/Myr]              |
| <b>Parameters</b>                                 |              |                      |
| $f_{\text{org}}$                                  | 0.2          | -                    |
| $k$                                               | 0.1          | [Myr <sup>-1</sup> ] |
| $\chi$                                            | 0.6          | -                    |
| $\alpha_{\text{carb}}$                            | 1            | -                    |
| $\alpha_{\text{org}}$                             | 0            | -                    |
| $\kappa_1$                                        | $10^{13}$    | [g/Myr]              |
| $\kappa_2$                                        | $10^{13}$    | [g/Myr]              |
| $\delta^{13}\text{C}_{\text{prm}}$                | -5           | -                    |
| $\tau_{\text{arc}}$                               | 30           | Myr                  |
| $\tau_{\text{OIB}}$                               | 350          | Myr                  |
| $dt$                                              | 1            | Myr                  |

145 At the start of the model, all C is held in the primitive mantle reservoir with other reservoirs  
 146 holding no C. Very quickly the other C reservoirs stabilize at a steady-state value in response to  
 147 the initial volcanic CO<sub>2</sub> fluxes (Fig. 5c,d and Supp. Fig. 3c,d)  
 148

149 **Supplementary Table 2** C isotopes of arc CO<sub>2</sub> emissions and  $f_{\text{org}}$  of sediments used to generate  
 150 Fig. 2a

| Arc             | $\delta^{13}\text{C}$ | $\sigma$ | $f_{\text{org}}$ of subducting sediments |
|-----------------|-----------------------|----------|------------------------------------------|
| Kermadec        | -2.8                  | 0.8      | 0.08                                     |
| Kuril-Kamchatka | -6.1                  | 1.1      | 0.75                                     |
| Cascades        | -8.6                  | 1.2      | 0.57                                     |
| Guatemala       | -2.9                  | 0.1      | 0.10                                     |
| Mexico          | -6.3                  | 0.0      | 0.63                                     |
| Nicaragua       | -2.8                  | 0.6      | 0.13                                     |
| Costa Rica      | -4.1                  | 1.4      | 0.12                                     |
| Colombia        | -6.9                  | 1.7      | 0.14                                     |
| N. Chile        | -4.1                  | 2.6      | 0.17                                     |
| Aleutians       | -7.0                  | 2.0      | 0.38                                     |
| Lesser Antilles | -4.3                  | 0.5      | 0.22                                     |
| Java            | -3.7                  | 0.8      | 0.06                                     |
| SW Japan        | -5.9                  | 1.4      | 0.41                                     |
| NE Japan        | -3.8                  | 1.1      | 0.89                                     |
| Aegean          | -2.4                  | 1.0      | 0.61                                     |

151  $\delta^{13}\text{C}$  is the mean of all  $\delta^{13}\text{C}$  measured at individual volcanoes from a particular arc (Data from  
 152 Ref. <sup>22</sup>).  $\sigma$  is one standard deviation of the mean  $\delta^{13}\text{C}$  for a particular arc.  $f_{\text{org}}$  of subducting  
 153 sediments is the ratio of organic carbon to carbonates for a specific arc (Data from Ref. <sup>48</sup>). Arcs  
 154 marked as orange dots in Fig. 2a, indicating significant upper plate carbonate assimilation are NE  
 155 Japan and Aegean arcs.

156  
 157

158 **Supplementary Table 3**  $\delta^{13}\text{C}$  data for intraplate ocean island volcanoes used in Fig. 3

| Reference                          | Location | Sample Type    | $\delta^{13}\text{C}$ | CO <sub>2</sub> (ppm) |
|------------------------------------|----------|----------------|-----------------------|-----------------------|
| Hauri (2002) <sup>35</sup>         | Koolau   | melt inclusion | -29.0                 | 234                   |
|                                    |          |                | -18.0                 | 177                   |
|                                    |          |                | <b>-12.0</b>          | <b>563</b>            |
| Aubaud et al. (2005) <sup>23</sup> | Society  | vesicle        | -5.7                  | 562                   |
|                                    |          |                | -4.2                  | 224                   |
|                                    |          |                | -5.2                  | 53                    |
|                                    |          |                | -6.8                  | 136                   |
|                                    |          |                | -7.1                  | 36                    |
|                                    |          |                | -7.2                  | 127                   |
|                                    |          |                | -6.3                  | 131                   |
|                                    |          |                | <b>-3.8</b>           | <b>1487</b>           |
|                                    |          |                | -4.1                  | 995                   |
|                                    |          |                | -7.7                  | 4                     |
| -7.0                               | 6        |                |                       |                       |
| -6.6                               | 8        |                |                       |                       |

|                                    |          |         |             |            |
|------------------------------------|----------|---------|-------------|------------|
|                                    |          |         | -6.1        | 120        |
|                                    |          |         | -6.2        | 43         |
|                                    |          |         | -6.1        | 75         |
|                                    |          |         | -6.7        | 130        |
|                                    |          |         | -6.7        | 49         |
|                                    |          |         | -6.8        | 11         |
|                                    |          |         | -9.7        | 1          |
|                                    |          |         | -8.0        | 11         |
|                                    |          |         | -8.6        | 57         |
|                                    |          |         | -5.0        | 18         |
|                                    |          |         | -4.9        | 25         |
|                                    |          |         | -4.9        | 21         |
|                                    |          |         | -6.8        | 24         |
|                                    |          |         | -5.7        | 27         |
|                                    |          |         | -5.3        | 69         |
| Aubaud et al. (2006) <sup>21</sup> | Pitcairn | vesicle | -13.5       | 11         |
|                                    |          |         | -13.0       | 10         |
|                                    |          |         | -13.9       | 21         |
|                                    |          |         | -6.7        | 820        |
|                                    |          |         | -9.3        | 70         |
|                                    |          |         | -10.8       | 66         |
|                                    |          |         | -10.6       | 23         |
|                                    |          |         | -11.5       | 17         |
|                                    |          |         | -6.7        | 470        |
|                                    |          |         | <b>-6.7</b> | <b>870</b> |
|                                    |          |         | -7.0        | 500        |
|                                    |          |         | -7.0        | 680        |
|                                    |          |         | -7.6        | 100        |
|                                    |          |         | -7.0        | 18         |
|                                    |          |         | -15.7       | 6          |
|                                    |          |         | -7.9        | 76         |
|                                    |          |         | -8.2        | 37         |
|                                    |          |         | -9.5        | 37         |
|                                    |          |         | -9.1        | 115        |
|                                    |          |         | -10.0       | 61         |
|                                    |          |         | -9.3        | 65         |
|                                    |          |         | -9.9        | 88         |
|                                    |          |         | -7.5        | 36         |
|                                    |          |         | -11.5       | 2          |
|                                    |          |         | -15.7       | 12         |
|                                    |          |         | -11.8       | 2          |
|                                    |          |         | -10.9       | 16         |
|                                    |          |         | -10.7       | 51         |

|                                       |         |                |              |            |
|---------------------------------------|---------|----------------|--------------|------------|
|                                       |         |                | -14.4        | 12         |
|                                       |         |                | -10.1        | 69         |
|                                       |         |                | -7.6         | 39         |
|                                       |         |                | -12.3        | 7          |
|                                       |         |                | -10.0        | 9          |
|                                       |         |                | -12.1        | 10         |
|                                       |         |                | -6.0         | 270        |
| Exley et al. (1986) <sup>36</sup>     | Loihi   | glass chips    | -6.9         | 147        |
|                                       |         |                | -13.7        | 55         |
|                                       |         |                | -15.0        | 59         |
|                                       |         |                | -12.1        | 51         |
|                                       |         |                | <b>-17.3</b> | <b>220</b> |
|                                       |         |                | -15.6        | 85         |
|                                       |         |                | -16.6        | 148        |
|                                       |         |                | -19.3        | 32         |
| Gerlach & Taylor (1990) <sup>34</sup> | Kilauea | volcanic gases | -8.9         | n/a        |
|                                       |         |                | -7.3         | n/a        |
|                                       |         |                | -7.6         | n/a        |
|                                       |         |                | -8.5         | n/a        |
|                                       |         |                | -7.4         | n/a        |
|                                       |         |                | -7.5         | n/a        |
|                                       |         |                | -6.9         | n/a        |
|                                       |         |                | -8.9         | n/a        |
|                                       |         |                | -7.4         | n/a        |

159 Values marked in bold are least degassed samples for a particular dataset, which are marked with  
160 stars in Fig. 3

161

162

163

**Supplementary Table 4** Sediment partial melt compositions used in Supp. Fig. 1.

| Oxide                          | Dobson et al.,<br>1989 <sup>60</sup> | Tsuno & Dasgupta,<br>2012 <sup>61</sup> | Duncan & Dasgupta,<br>2017 <sup>27</sup> |
|--------------------------------|--------------------------------------|-----------------------------------------|------------------------------------------|
| SiO <sub>2</sub>               | 77.70                                | 59.67                                   | 68.77                                    |
| TiO <sub>2</sub>               | 0.07                                 | 0.62                                    | 0.56                                     |
| Al <sub>2</sub> O <sub>3</sub> | 13.00                                | 12.45                                   | 15.71                                    |
| FeO                            | 0.38                                 | 6.09                                    | 0.99                                     |
| MnO                            | 0.04                                 | 0.17                                    | 0.50                                     |
| MgO                            | 0.05                                 | 2.46                                    | 0.19                                     |
| CaO                            | 0.52                                 | 8.01                                    | 1.47                                     |
| Na <sub>2</sub> O              | 4.08                                 | 2.23                                    | 4.19                                     |
| K <sub>2</sub> O               | 4.19                                 | 1.97                                    | 7.33                                     |

164

165

166 **References**

- 167
- 168 14. Fuentes, J. J., Crowley, J. W., Dasgupta, R. & Mitrovica, J. X. The influence of plate  
169 tectonic style on melt production and CO<sub>2</sub> outgassing flux at mid-ocean ridges. *Earth*  
170 *Planet. Sci. Lett.* **511**, 154–163 (2019).
- 171 17. Sobolev, S. V & Brown, M. Surface erosion events controlled the evolution of plate  
172 tectonics on Earth. *Nature* **570**, 52–57 (2019).
- 173 21. Aubaud, C., Pineau, F., Hékinian, R. & Javoy, M. Carbon and hydrogen isotope  
174 constraints on degassing of CO<sub>2</sub> and H<sub>2</sub>O in submarine lavas from the Pitcairn hotspot  
175 (South Pacific). *Geophys. Res. Lett.* **33**, L02308 (2006).
- 176 22. Mason, E., Edmonds, M. & Turchyn, A. V. Remobilization of crustal carbon may  
177 dominate volcanic arc emissions. *Science*. **357**, 290–294 (2017).
- 178 23. Aubaud, C., Pineau, F., Hékinian, R. & Javoy, M. Degassing of CO<sub>2</sub> and H<sub>2</sub>O in  
179 submarine lavas from the Society hotspot. *Earth Planet. Sci. Lett.* **235**, 511–527 (2005).
- 180 24. Keller, C. B. *et al.* Neoproterozoic glacial origin of the Great Unconformity. *Proc. Natl.*  
181 *Acad. Sci.* **116**, 1136–1145 (2019).
- 182 27. Duncan, M. S. & Dasgupta, R. Rise of Earth’s atmospheric oxygen controlled by efficient  
183 subduction of organic carbon. *Nat. Geosci.* **10**, 387–392 (2017).
- 184 32. Li, M. & McNamara, A. K. The difficulty for subducted oceanic crust to accumulate at the  
185 Earth’s core-mantle boundary. *J. Geophys. Res. Solid Earth* **118**, 1807–1816 (2013).
- 186 34. Gerlach, T. M. & Taylor, B. E. Carbon isotope constraints on degassing of carbon dioxide  
187 from Kilauea Volcano. *Geochim. Cosmochim. Acta* **54**, 2051–2058 (1990).

- 188 35. Hauri, E. SIMS analysis of volatiles in silicate glasses, 2: isotopes and abundances in  
189 Hawaiian melt inclusions. *Chem. Geol.* **183**, 115–141 (2002).
- 190 36. Exley, R. A., Matthey, D. P., Clague, D. A. & Pillinger, C. T. Carbon isotope systematics  
191 of a mantle ‘hotspot’: a comparison of Loihi Seamount and MORB glasses. *Earth Planet.*  
192 *Sci. Lett.* **78**, 189–199 (1986).
- 193 41. Dasgupta, R. & Hirschmann, M. M. The deep carbon cycle and melting in Earth’s interior.  
194 *Earth Planet. Sci. Lett.* **298**, 1–13 (2010).
- 195 45. Williams, J. J., Mills, B. J. W. & Lenton, T. M. A tectonically driven Ediacaran  
196 oxygenation event. *Nat. Commun.* **10**, 2690 (2019).
- 197 48. Clift, P. D. A revised budget for Cenozoic sedimentary carbon subduction. *Rev. Geophys.*  
198 **55**, 97–125 (2017).
- 199 55. Eguchi, J. & Dasgupta, R. A CO<sub>2</sub> solubility model for silicate melts from fluid saturation  
200 to graphite or diamond saturation. *Chem. Geol.* **487**, 23–38 (2018).
- 201 56. Caves, J. K., Jost, A. B., Lau, K. V. & Maher, K. Cenozoic carbon cycle imbalances and a  
202 variable weathering feedback. *Earth Planet. Sci. Lett.* **450**, 152–163 (2016).
- 203 57. Berner, R. A. GEOCARBSULF: A combined model for Phanerozoic atmospheric O<sub>2</sub> and  
204 CO<sub>2</sub>. *Geochim. Cosmochim. Acta* **70**, 5653–5664 (2006).
- 205 58. Falkowski, P. *et al.* The global carbon cycle: A test of our knowledge of earth as a system.  
206 *Science* **290**, 291–296 (2000).
- 207 59. Berner, R. A., Lasaga, A. C. & Garrels, R. M. The carbonate-silicate geochemical cycle



208 and its effect on atmospheric carbon dioxide over the past 100 million years. *Am. J. Sci.*  
209 **283**, 641–683 (1983).

210 60. Dobson, P. F., Epstein, S. & Stolper, E. M. Hydrogen isotope fractionation between  
211 coexisting vapor and silicate glasses and melts at low pressure. *Geochim. Cosmochim.*  
212 *Acta* **53**, 2723–2730 (1989).

213 61. Tsuno, K. & Dasgupta, R. The effect of carbonates on near-solidus melting of pelite at 3  
214 GPa: Relative efficiency of H<sub>2</sub>O and CO<sub>2</sub> subduction. *Earth Planet. Sci. Lett.* **319–320**,  
215 185–196 (2012).

216
